# Supplementary material for: Dual-frequency radar observations of snowmelt processes on Antarctic perennial sea ice by CFOSCAT and ASCAT
Source: Copernicus journal article supplement (doi:10.5194/tc-18-5769-2024), 2024-12-11
Supplement: Supplementary file 1 [file tc-18-5769-2024-supplement.pdf]

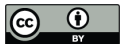

*Supplement of*

## **Dual-frequency radar observations of snowmelt processes on Antarctic perennial sea ice by CFOSCAT and ASCAT**

**Rui Xu et al.**

*Correspondence to:* Chaofang Zhao ([zhaocf@ouc.edu.cn](mailto:zhaocf@ouc.edu.cn))

The copyright of individual parts of the supplement might differ from the article licence.

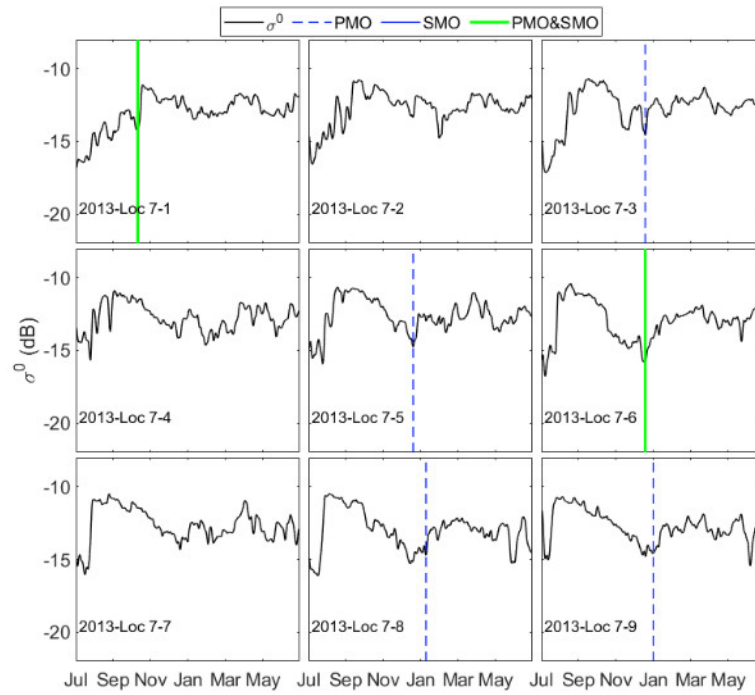

**Figure S1.** The ASCAT backscatter time series superimposed with the derived PMO and SMO for 9 pixels around the Location 7 in 2013/2014.
